# Supplementary figures and images for: Physical Activity Opportunities in US Early Child Care Programs
Source: Oxford University Press journal article supplement (doi:10.1542/peds.2020-048850), 2022-05-18

## Supplemental Information

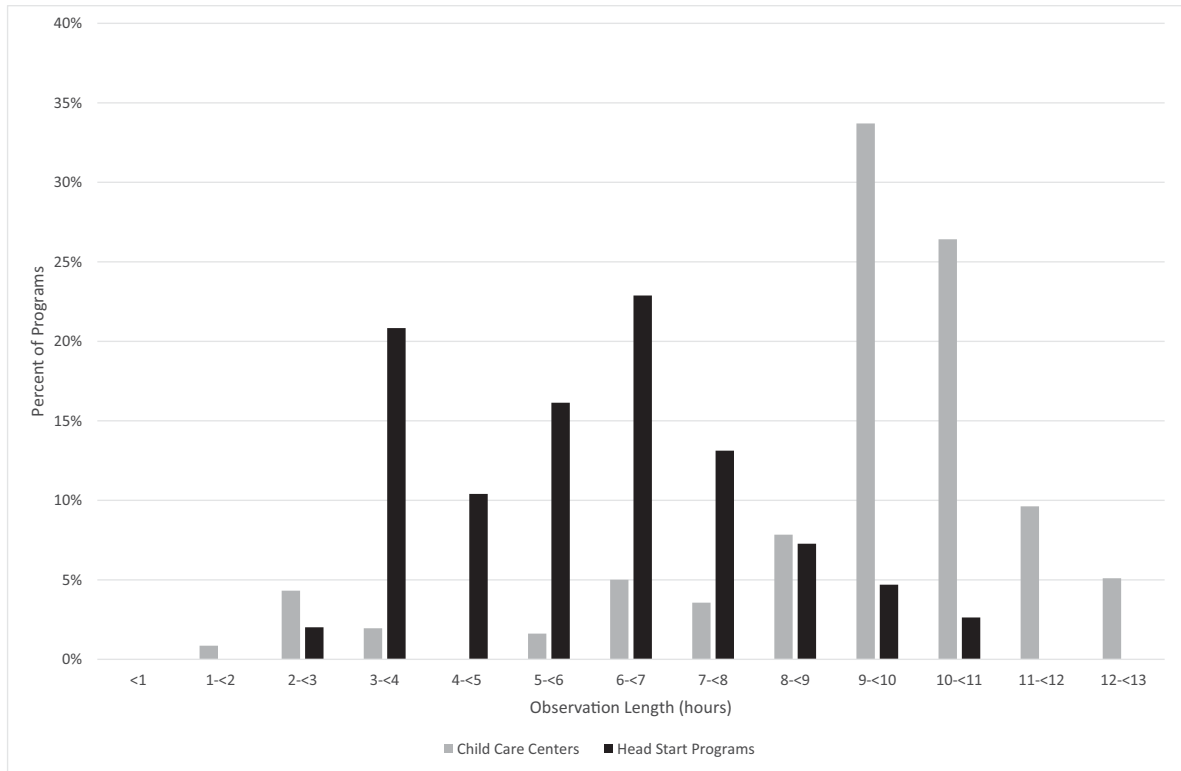

### SUPPLEMENTAL FIGURE 1

Observation day length in hours, ECE programs.

Supplement: peds_2020048850supplementarydata.pdf [file peds_2020048850supplementarydata.pdf]
